# Supplementary material
Source: ML conference proceedings conference paper supplement (https://proceedings.mlr.press/v32/xu14.html)
Supplement: Supplementary file 1 [file xu14-supp.pdf]

---

# Large-margin Weakly Supervised Dimensionality Reduction (Supplementary Material)

---

## 1. Proof of Theorem 1

**Theorem 1.** Fix  $\theta \geq 0$ . For any preference pair  $(z_1, z_2)$  in low-dimensional space  $\mathcal{Z} \subset \mathbb{R}^d$ , which can be partitioned into  $K$  disjoint sets, denoted by  $\{C_{i=1}^K\}_{i=1}^K$ , assume that  $\|z_1 - z_2\| \in [a, b]$ . Given a linear preference learning algorithm  $\mathcal{A}$   $\{w : z \rightarrow \mathbb{R}\}$  and  $\|w\| \leq W$ , we have for any  $s \subset \mathcal{Z}$ ,

$$\begin{aligned} |\ell(\mathcal{A}_s, z_1, z_2) - \ell(\mathcal{A}_s, s_1, s_2)| &\leq W \sqrt{2b^2 - 2a^2 \cos(\theta)} \\ \forall i, j = 1, \dots, K : s_1, z_1 \in C_i \text{ and } s_2, z_2 \in C_j, \\ \cos(z_1 - z_2, s_1 - s_2) &\geq \cos(\theta). \end{aligned}$$

Hence  $\mathcal{A}$  is  $(K, W \sqrt{2b^2 - 2a^2 \cos(\theta)})$ -robust.

*Proof.* We can partition  $\mathcal{Z}$  into  $K$  disjoint sets so that if preference pairs  $(s_1, s_2)$  and  $(z_1, z_2)$  are close, then

$$\cos(z_1 - z_2, s_1 - s_2) \geq \cos(\theta).$$

Therefore,

$$\begin{aligned} &|\ell(w, z_1, z_2) - \ell(w, s_1, s_2)| \\ &= |[1 - \langle w, z_1 - z_2 \rangle]^+ - [1 - \langle w, s_1 - s_2 \rangle]^+| \\ &\leq |\langle w, (z_1 - z_2) - (s_1 - s_2) \rangle| \\ &\leq W \|(z_1 - z_2) - (s_1 - s_2)\|. \end{aligned}$$

For the norm term, we have

$$\begin{aligned} &\|(z_1 - z_2) - (s_1 - s_2)\|^2 \\ &= \|z_1 - z_2\|^2 + \|s_1 - s_2\|^2 - 2\langle z_1 - z_2, s_1 - s_2 \rangle \\ &\leq 2b^2 - 2a^2 \cos(\theta). \end{aligned}$$

By combining the above results, the proof is completed. □

## 2. Proof of Theorem 2

**Theorem 2.** If a preference learning algorithm  $\mathcal{A}$  is  $(K, \epsilon(\cdot))$ -robust and the training sample  $s$  is composed of  $n$  preference pairs  $\{p_i = (s_1, s_2)\}_{i=1}^n$  whose examples are generated from  $\mu$ , then for any  $\delta > 0$ , with probability at least  $1 - \delta$ , we have,

$$|\mathcal{L}(\mathcal{A}_s) - \ell_{emp}(\mathcal{A}_s)| \leq \epsilon(s) + 2B \sqrt{\frac{2K \ln 2 + 2 \ln(1/\delta)}{n}}.$$

*Proof.* Let  $N_i$  be the set of index of points of  $s$  that fall into the  $C_i$ .  $(|N_1|, \dots, |N_K|)$  is a IID random variable with parameters  $n$  and  $(\mu(C_1), \dots, \mu(C_K))$ . We have

$$\begin{aligned} &|\mathcal{L}(\mathcal{A}_s) - \ell_{emp}(\mathcal{A}_s)| \\ &= \left| \sum_{i=1}^K \sum_{j=1}^K E_{z_1, z_2 \sim \mu}(\ell(\mathcal{A}_s, z_1, z_2) | z_1 \in C_i, z_2 \in C_j) \mu(C_i) \mu(C_j) - \frac{1}{n^2} \sum_{i=1}^n \ell(\mathcal{A}_s, p_{(i,1)}, p_{(i,2)}) \right| \end{aligned}$$

$$\begin{aligned}
 &\leq \left| \sum_{i=1}^K \sum_{j=1}^K E_{z_1, z_2 \sim \mu}(\ell(\mathcal{A}_s, z_1, z_2) | z_1 \in C_i, z_2 \in C_j) \mu(C_i) \mu(C_j) \right. \\
 &\quad - \sum_{i=1}^K \sum_{j=1}^K E_{z_1, z_2 \sim \mu}(\ell(\mathcal{A}_s, z_1, z_2) | z_1 \in C_i, z_2 \in C_j) \mu(C_i) \frac{N_j}{n} \left. \right| \\
 &\quad + \left| \sum_{i=1}^K \sum_{j=1}^K E_{z_1, z_2 \sim \mu}(\ell(\mathcal{A}_s, z_1, z_2) | z_1 \in C_i, z_2 \in C_j) \mu(C_i) \frac{N_j}{n} - \frac{1}{n^2} \sum_{i=1}^n \ell(\mathcal{A}_s, p_{(i,1)}, p_{(i,2)}) \right| \\
 &\leq \left| \sum_{i=1}^K \sum_{j=1}^K E_{z_1, z_2 \sim \mu}(\ell(\mathcal{A}_s, z_1, z_2) | z_1 \in C_i, z_2 \in C_j) \mu(C_i) \left( \mu(C_j) - \frac{N_j}{n} \right) \right| \\
 &\quad + \left| \sum_{i=1}^K \sum_{j=1}^K E_{z_1, z_2 \sim \mu}(\ell(\mathcal{A}_s, z_1, z_2) | z_1 \in C_i, z_2 \in C_j) \mu(C_i) \frac{N_j}{n} \right. \\
 &\quad \left. - \sum_{i=1}^K \sum_{j=1}^K E_{z_1, z_2 \sim \mu}(\ell(\mathcal{A}_s, z_1, z_2) | z_1 \in C_i, z_2 \in C_j) \frac{N_i}{n} \frac{N_j}{n} \right| \\
 &\quad + \left| \sum_{i=1}^K \sum_{j=1}^K E_{z_1, z_2 \sim \mu}(\ell(\mathcal{A}_s, z_1, z_2) | z_1 \in C_i, z_2 \in C_j) \frac{N_i}{n} \frac{N_j}{n} \frac{1}{n^2} \sum_{i=1}^n \ell(\mathcal{A}_s, p_{(i,1)}, p_{(i,2)}) \right| \\
 &\leq B \left| \sum_{j=1}^K \left( \mu(C_j) - \frac{N_j}{n} \right) \right| + B \left| \sum_{i=1}^K \left( \mu(C_i) - \frac{N_i}{n} \right) \right| + \left| \frac{1}{n^2} \sum_{i=1}^K \sum_{j=1}^K \sum_{a \in N_i} \sum_{b \in N_j} \max_{z \in C_i} \max_{z' \in C_j} |\ell(\mathcal{A}_s, z, z') - \ell(\mathcal{A}_s, s_a, s_b)| \right| \\
 &\leq \epsilon(s) + 2B \sum_{i=1}^K \left| \frac{N_i}{n} - \mu(C_i) \right| \\
 &\leq \epsilon(s) + 2B \sqrt{\frac{2K \ln 2 + 2 \ln(1/\delta)}{n}}.
 \end{aligned}$$

The first and second inequalities are due to the triangle inequality, and the third inequality is because of  $\sum_{i=1}^K \mu(C_i) = 1$  and  $\sum_{i=1}^K \frac{N_i}{n} = 1$ . Finally, the last inequality is the application of Proposition 1.  $\square$
